# Supplementary material for: Vascular endothelial PDPK1 plays a pivotal role in the maintenance of pancreatic beta cell mass and function in adult male mice
Source: PubMed Central journal article supplement (PMC6560212; doi:10.1007/s00125-019-4878-1), 2019-05-04
Supplement: 125_2019_4878_MOESM1_ESM.pdf [file 125_2019_4878_MOESM1_ESM.pdf]

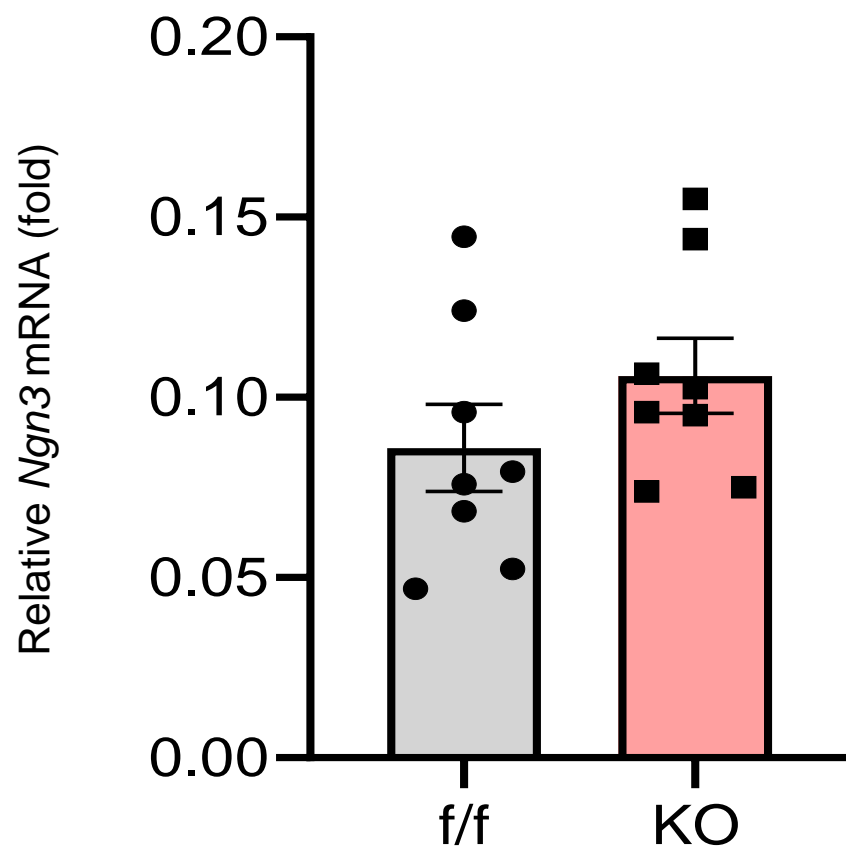**ESM Fig.1**

*Ngn3* mRNA expression in islets was comparable between control *flox* and VE-PDPK1-KO mice. (n=8 mice) Values are the means  $\pm$  SEM. *f/f*, control *flox* mice; KO, VE-PDPK1-KO mice



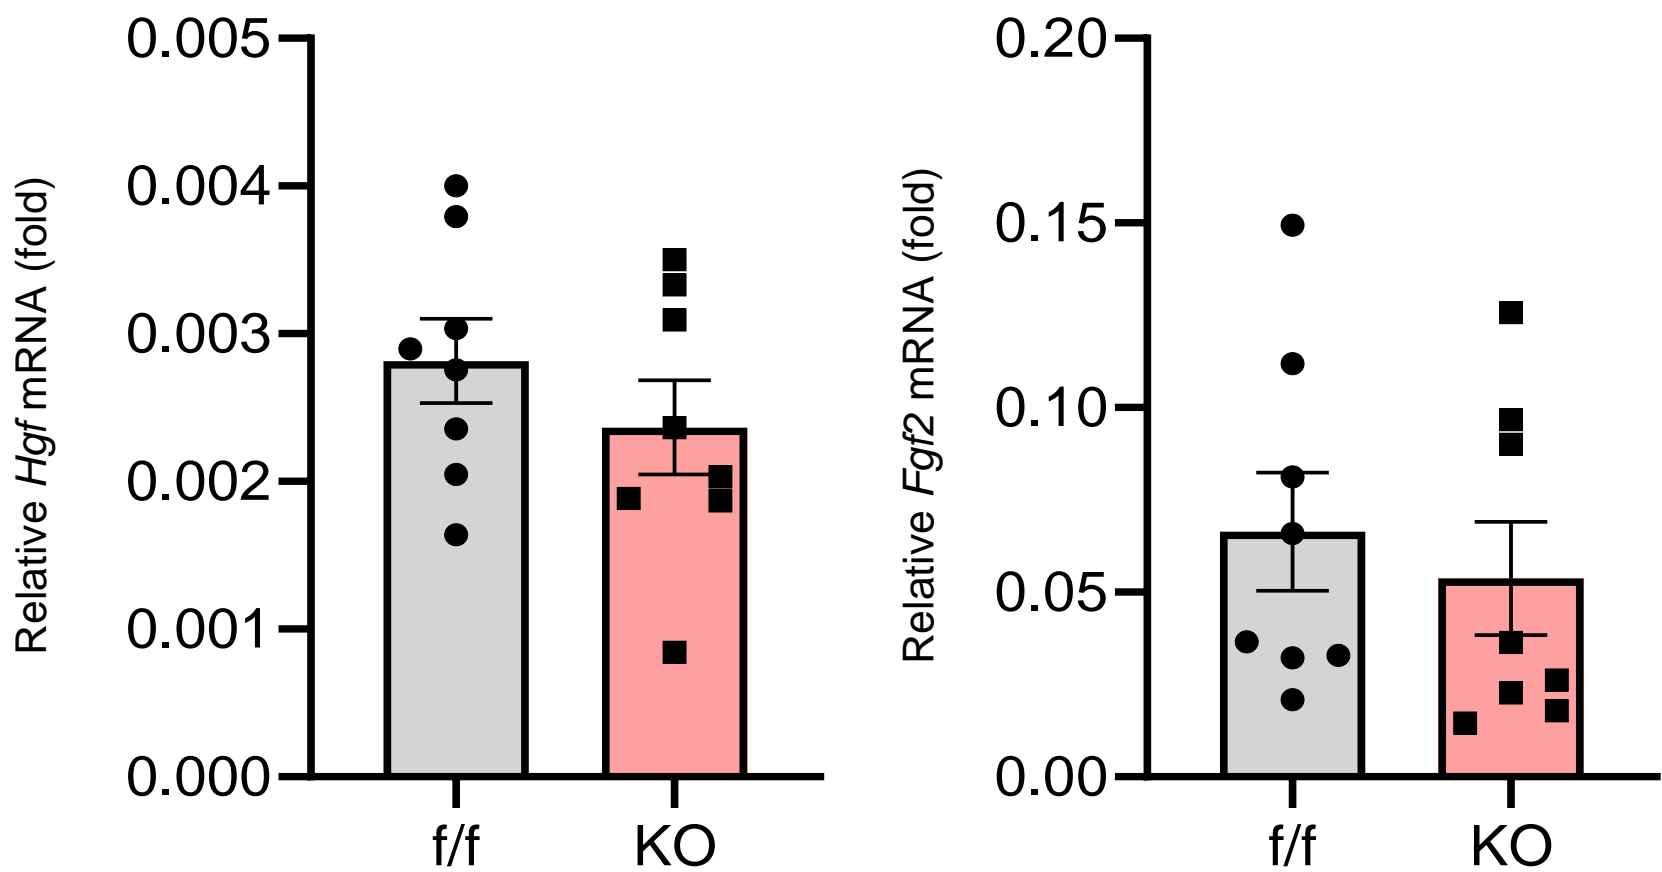**ESM Fig.3**

mRNA expression levels of *Hgf* and *Fgf2* in islets were comparable between control *flox* and VE-PDKPK1-KO mice. (n=8 mice) Values are the means  $\pm$  SEM. f/f, control *flox* mice; KO, VE-PDKPK1-KO mice

## Primer Sequences

|                       | Forward                     | Reverse                   |
|-----------------------|-----------------------------|---------------------------|
| mouse <i>Ins1</i>     | CCCTTAGTGACCAGCTATAATCAGAGA | ACCACAAAGATGCTGTTTGACAA   |
| mouse <i>Ins2</i>     | CTGCTGGCCCTGCTCTTC          | AACCACAAAGGTGCTGCTTGA     |
| mouse <i>Mafa</i>     | CCAGCTGGTATCCATGTCC         | TTCTGTTTCAGTCGGATGACC     |
| mouse <i>Pdx1</i>     | CGGCTGAGCAAGCTAAGGTT        | TGGAAGAAGCGCTCTCTTTGA     |
| mouse <i>Neurod</i>   | AGGAACACGAGGCAGACAAGA       | CTCCCCCGTTTCTCAGAGAGT     |
| mouse <i>Gck</i>      | CCCTGAGTGGCTTACAGTTC        | ACTGATGTGAGTGTTGAAGC      |
| mouse <i>Slc2a2</i>   | TTACCGACAGCCATCCT           | TGAAAATGCTGGTTGAATAGTAAA  |
| mouse <i>Glp1r</i>    | ACTTTCTTTCTCCGCCTTGGT       | CCTGGTGCAGTGCAAGTGTCT     |
| mouse <i>Gipr</i>     | GGAGCGCAACGAAGTCAA          | CTGGCCCTACCAAGATGGTTAT    |
| mouse <i>Bcl2</i>     | CGCTGCGGTGCTCTTGA           | TCACACTCCGGCTTCACTGA      |
| mouse <i>Bax</i>      | GGAAGGCCTCCTCTCCTACTTC      | TGAGGACTCCAGCCACAAAGA     |
| mouse <i>Caspase8</i> | GAGATCCTGTGAATGGAACCTGGTA   | GTTACGCCAGTCAGGATGCTA     |
| mouse <i>Caspase3</i> | CTGGACTGTGGCATTGAGACA       | CAGCCTCCACCGGTATCTTC      |
| mouse <i>Ccnd1</i>    | TCGTGGCCTCTAAGATGAAGGA      | CCTCGGGCCGGATAGAGTT       |
| mouse <i>Irs2</i>     | GGACCCACCTGACTTCTCA         | GCAGGAACAGGGAGCCTTATAA    |
| mouse <i>Insr</i>     | TGAAGGCAATGCCAAGGATATC      | AAGACTGGCTGACTCATTGACAGT  |
| mouse <i>Igf1r</i>    | CCGCGCCAGTTTTGATG           | AGGCAAGGCCCTCTCGTT        |
| mouse <i>Irs1</i>     | CGGGCTGACTCCAAGAACA         | TCGCTATCCGCGGCAAT         |
| mouse <i>Hif1a</i>    | AGGAGCCTGATGCTCTCACTCT      | TGTGTCATCGCTGCCAAAT       |
| mouse <i>Adm</i>      | GCAATGCTTGTTGTCCAGCC        | ACACACACACACACACACGGAAC   |
| mouse <i>Eno1</i>     | GATGGACGGCACAGAGAATAAATC    | AGGCAGGATGACTTCAGGGTTG    |
| mouse <i>Tpi1</i>     | CCTTCCATTGGTTTGGGCTG        | AATACAGGGGCTTTGGCACC      |
| mouse <i>Hmox1</i>    | CCACACAGCACTATGTAAAGCGTC    | GTTCCGGGAAGGTAAAAAAGCC    |
| mouse <i>Vegfa</i>    | GTACCTCCACCATGCCAAGT        | GCATTCACATCTGCTGTGCT      |
| mouse <i>Bip</i>      | TCATCGGACGCACTTGGAA         | AACCACCTTGAATGGCAAGAA     |
| mouse <i>Fkbp11</i>   | ACACGCTCCACATACTACACGG      | ATGACTGCTCTTCGCTTCTCTCCC  |
| mouse <i>sXbp1</i>    | GAGTCCGCAGCAGGTG            | GTGTCAGAGTCCATGGGA        |
| mouse <i>tXbp1</i>    | TTCATGAATGGCCCTTAGCAT       | AAAACAAGCCCCCTCAGGTT      |
| mouse <i>Atf3</i>     | CCTCAGAAGTCAGTGCGACC        | CATCCGATGGCAGAGGTGTT      |
| mouse <i>Ddit3</i>    | GGAGCCAGGGCCAACAG           | GCCATAGAACTCTGACTGGAATCTG |
| mouse <i>Trb3</i>     | TCTTCAGCAACTGTGAGAGGACG     | TCCAGACATCAGCCGCTTTG      |
| mouse <i>Ngn3</i>     | GCGCAAGAAGGCCAATGA          | CAGCGCCGAGTTGAGGTT        |
| mouse <i>Hgf</i>      | TAAACGTGCGCTCACAGTG         | TTCTCCTTGGCCTTGAATGC      |
| mouse <i>Fgf2</i>     | TGTGGCACTGAAACGAACTG        | AACAGTATGGCCTTCTGTCCAG    |
